# Supplementary material for: Juniper tree-ring data from the Kuramenian Mountains (Republic of Tajikistan), reveals changing summer drought signals in western Central Asia
Source: Copernicus journal article supplement (doi:10.5194/cp-2018-44), 2018-04-27
Supplement: Supplementary file 1 [file S1.xls]

## Sheet: 重建与实测
1900
1901	-0.707479	1.60296
1902	1.89866	0.855
1903	1.46697	0.92944
1904	-2.35406	0.04324
1905	-1.61563	-0.2049
1906	-1.50657	-0.36087
1907	-0.976788	2.30838
1908	-0.367979	0.56078
1909	-2.49538	-1.1301
1910	-0.97332	-0.27934
1911	-1.1539	-1.02375
1912	-0.107055	0.42962
1913	-2.29063	-0.91741
1914	-0.59606	0.20984
1915	-2.67123	-1.84615
1916	-2.89056	-1.8816
1917	-4.42744	-5.44768
1918	-4.71788	-4.19991
1919	-3.88583	-2.8387
1920	-1.72642	-0.76144
1921	1.09993	1.51434
1922	-0.913034	2.19494
1923	-0.629066	1.92908
1924	-0.627165	2.62032
1925	-1.62151	0.69903
1926	-2.61396	-0.65509
1927	-4.37557	-3.06557
1928	-3.04913	-0.73308
1929	-2.95071	-0.09146
1930	-3.75377	0.80892
1931	-2.66037	-0.18717
1932	-2.07555	-0.19781
1933	-2.69552	-2.20418
1934	0.147822	-0.16591
1935	-1.09175	-0.78625
1936	-1.70391	-0.81461
1937	-2.1921	-1.05211
1938	-2.63947	-2.06593
1939	-4.02836	-3.15064
1940	-3.36369	-2.67209
1941	-2.20175	-2.27507
1942	-1.58691	-0.47076
1943	-1.619	-0.20844
1944	-3.04246	-0.86424
1945	-1.43123	0.19212
1946	-2.36999	-0.05247
1947	-2.78985	0.40481
1948	-2.42203	-0.73308
1949	-0.821159	-0.64446
1950	-2.88932	-1.64764
1951	-2.38962	-0.39986
1952	-0.904583	-0.2049
1953	-0.130804	-0.8217
1954	-0.127337	-0.71535
1955	-1.93443	-0.9564
1956	-2.05208	-1.4385
1957	-0.308025	-0.9883
1958	1.1538	-0.93159
1959	-1.11558	-1.53066
1960	-0.684155	-1.56256
1961	-2.19119	-2.07656
1962	-2.97858	-1.52712
1963	-1.35022	-1.34633
1964	-0.806372	-1.82134
1965	-3.16559	-1.66182
1966	-0.316831	-0.25453
1967	-0.78118	-0.82524
1968	0.0362897	0.39418
1969	4.79987	0.56433
1970	-2.26717	-0.27225
1971	-3.39677	-0.59483
1972	-2.05665	-0.03475
1973	-2.06691	-1.58738
1974	-2.8846	-3.03366
1975	-3.57273	-3.24281
1976	-2.52505	-1.93831
1977	-0.74172	-2.00921
1978	-0.15783	-1.27898
1979	-0.720304	-0.63382
1980	-0.613698	-0.648
1981	0.439674	0.50761
1982	-1.90276	-2.57284
1983	-1.09796	-0.86069
1984	-2.01917	-1.09819
1985	-1.47419	-1.07338
1986	-2.20128	-1.75044
1987	0.329417	-0.65509
1988	-1.31781	-2.57993
1989	-2.63115	-2.42395
1990	-0.788426	-1.4704
1991	-0.435232	-0.25807
1992	1.00678	0.66713
1993	1.67266	0.91526
1994	-0.108411	1.39381
1995	-2.15299	1.5037
1996	-1.44375	-0.52748
1997	-1.59646	-0.45304
1998	2.87292	0.81601
1999	2.39549	0.85855
2000	-1.27759	-2.40269
2001	-2.44748	-0.91741
2002	2.30447	0.36582
2003	3.89305	-0.02766
2004	2.18893	-0.25807
2005	2.04375	0.75929
2006	-1.22899	-0.09501
2007	-0.117808	0.60686
2008	-3.14546	-1.80361
2009	0.310521	1.07478
2010	1.24112	0.84082
2011	-2.2109	-2.2928
2012	-1.64024	-0.37859
2013
2014
2015
2016
2017
2018
2019
2020
	1.02
	0.89
	1.08
	0.84
	0.97
	0.94
	1.05
	0.94
	1.07
	1.03
	1.1
	1.13
	1.14
	1.26
	0.79
	0.8
	0.96
	0.91
	0.85
	0.81
	1.01
	1.02
	0.98
	1
	1.02
	0.79
	0.88
	0.87
	1.04
	1.24
	1.17
	0.99
	0.98
	1.29
	1.28
	1.06
	0.97
	0.97
	0.99
	1.1
	1.03
	0.96
	1.2
	1.09
	1.23
	1.14

## Sheet: 重建序列
1650	-0.7508	-0.733532	-0.6539	-2.04953	-3.36553	0.582468	1.89847	0.795	0.957	5	0.85
1651	-0.21908	-0.733532	-0.676	-2.04953	-3.36553	0.582468	1.89847	0.795	0.957	5	0.85
1652	-2.15809	-0.733532	-0.6982	-2.04953	-3.36553	0.582468	1.89847	0.795	0.957	5	0.85
1653	1.24139	-0.733532	-0.7204	-2.04953	-3.36553	0.582468	1.89847	0.795	0.957	5	0.85
1654	-1.42432	-0.733532	-0.7434	-2.04953	-3.36553	0.582468	1.89847	0.795	0.957	5	0.85
1655	-1.89578	-0.733532	-0.7666	-2.04953	-3.36553	0.582468	1.89847	0.795	0.957	5	0.85
1656	-1.10174	-0.733532	-0.7897	-2.04953	-3.36553	0.582468	1.89847	0.795	0.957	5	0.85
1657	1.89009	-0.733532	-0.8142	-2.04953	-3.36553	0.582468	1.89847	0.795	0.957	5	0.85
1658	-1.84969	-0.733532	-0.8414	-2.04953	-3.36553	0.582468	1.89847	0.795	0.957	5	0.85
1659	-1.44559	-0.733532	-0.8697	-2.04953	-3.36553	0.582468	1.89847	0.795	0.957	5	0.85
1660	-1.41368	-0.733532	-0.8984	-2.04953	-3.36553	0.582468	1.89847	0.795	0.957	5	0.85
1661	0.08223	-0.733532	-0.9277	-2.04953	-3.36553	0.582468	1.89847	0.795	0.957	5	0.85
1662	0.21693	-0.733532	-0.9583	-2.04953	-3.36553	0.582468	1.89847	0.795	0.957	5	0.85
1663	-0.69408	-0.733532	-0.9895	-2.04953	-3.36553	0.582468	1.89847	0.795	0.957	5	0.85
1664	-1.77171	-0.733532	-1.0191	-2.04953	-3.36553	0.582468	1.89847	0.795	0.957	5	0.85
1665	-1.62637	-0.733532	-1.0441	-2.04953	-3.36553	0.582468	1.89847	0.795	0.957	5	0.85
1666	-1.53775	-0.733532	-1.0628	-2.04953	-3.36553	0.582468	1.89847	0.795	0.957	5	0.85
1667	-0.52748	-0.733532	-1.0743	-2.04953	-3.36553	0.582468	1.89847	0.795	0.957	5	0.85
1668	-1.21163	-0.733532	-1.0783	-2.04953	-3.36553	0.582468	1.89847	0.795	0.957	5	0.85
1669	-0.39277	-0.733532	-1.0741	-2.04953	-3.36553	0.582468	1.89847	0.795	0.957	5	0.85
1670	-1.59092	-0.733532	-1.0607	-2.04953	-3.36553	0.582468	1.89847	0.795	0.957	5	0.85
1671	-2.67918	-0.733532	-1.0365	-2.04953	-3.36553	0.582468	1.89847	0.795	0.957	5	0.85
1672	-1.78589	-0.733532	-1.0009	-2.04953	-3.36553	0.582468	1.89847	0.795	0.957	5	0.85
1673	-0.87132	-0.733532	-0.9555	-2.04953	-3.36553	0.582468	1.89847	0.795	0.957	5	0.85
1674	-0.95286	-0.733532	-0.9031	-2.04953	-3.36553	0.582468	1.89847	0.795	0.957	5	0.85
1675	-0.54875	-0.733532	-0.8468	-2.04953	-3.36553	0.582468	1.89847	0.795	0.957	5	0.85
1676	-0.60546	-0.733532	-0.7895	-2.04953	-3.36553	0.582468	1.89847	0.72	0.951	5	0.85
1677	-1.07338	-0.733532	-0.7338	-2.04953	-3.36553	0.582468	1.89847	0.72	0.951	6	0.85
1678	-1.23999	-0.733532	-0.6821	-2.04953	-3.36553	0.582468	1.89847	0.72	0.951	6	0.85
1679	1.40445	-0.733532	-0.6373	-2.04953	-3.36553	0.582468	1.89847	0.72	0.951	7	0.85
1680	0.42608	-0.733532	-0.6024	-2.04953	-3.36553	0.582468	1.89847	0.72	0.951	6	0.85
1681	-0.70472	-0.733532	-0.5781	-2.04953	-3.36553	0.582468	1.89847	0.72	0.951	6	0.85
1682	-2.10847	-0.733532	-0.5632	-2.04953	-3.36553	0.582468	1.89847	0.72	0.951	6	0.85
1683	0.68485	-0.733532	-0.5569	-2.04953	-3.36553	0.582468	1.89847	0.72	0.951	6	0.85
1684	0.17794	-0.733532	-0.5598	-2.04953	-3.36553	0.582468	1.89847	0.72	0.951	6	0.85
1685	0.43317	-0.733532	-0.5714	-2.04953	-3.36553	0.582468	1.89847	0.72	0.951	6	0.85
1686	-0.98121	-0.733532	-0.5898	-2.04953	-3.36553	0.582468	1.89847	0.72	0.951	6	0.85
1687	-0.85715	-0.733532	-0.6115	-2.04953	-3.36553	0.582468	1.89847	0.72	0.951	6	0.85
1688	-2.04111	-0.733532	-0.6337	-2.04953	-3.36553	0.582468	1.89847	0.72	0.951	6	0.85
1689	-0.0702	-0.733532	-0.6541	-2.04953	-3.36553	0.582468	1.89847	0.72	0.951	7	0.85
1690	-0.12337	-0.733532	-0.672	-2.04953	-3.36553	0.582468	1.89847	0.72	0.951	7	0.85
1691	-0.69054	-0.733532	-0.6861	-2.04953	-3.36553	0.582468	1.89847	0.72	0.951	7	0.85
1692	-1.31797	-0.733532	-0.6947	-2.04953	-3.36553	0.582468	1.89847	0.72	0.951	7	0.85
1693	-2.65082	-0.733532	-0.6956	-2.04953	-3.36553	0.582468	1.89847	0.72	0.951	7	0.85
1694	-2.00212	-0.733532	-0.6884	-2.04953	-3.36553	0.582468	1.89847	0.72	0.951	7	0.85
1695	0.18503	-0.733532	-0.675	-2.04953	-3.36553	0.582468	1.89847	0.72	0.951	8	0.85
1696	-1.27898	-0.733532	-0.6593	-2.04953	-3.36553	0.582468	1.89847	0.72	0.951	8	0.85
1697	-0.43177	-0.733532	-0.6448	-2.04953	-3.36553	0.582468	1.89847	0.72	0.951	8	0.85
1698	0.63168	-0.733532	-0.6354	-2.04953	-3.36553	0.582468	1.89847	0.72	0.951	8	0.85
1699	0.0007	-0.733532	-0.6344	-2.04953	-3.36553	0.582468	1.89847	0.72	0.951	8	0.85
1700	0.52179	-0.733532	-0.6436	-2.04953	-3.36553	0.582468	1.89847	0.72	0.951	8	0.85
1701	-0.19072	-0.733532	-0.6634	-2.04953	-3.36553	0.582468	1.89847	0.395	0.851	8	0.85
1702	-0.15527	-0.733532	-0.6925	-2.04953	-3.36553	0.582468	1.89847	0.395	0.851	8	0.85
1703	-2.15455	-0.733532	-0.7286	-2.04953	-3.36553	0.582468	1.89847	0.395	0.851	8	0.85
1704	-0.61255	-0.733532	-0.7691	-2.04953	-3.36553	0.582468	1.89847	0.395	0.851	8	0.85
1705	-0.93868	-0.733532	-0.8128	-2.04953	-3.36553	0.582468	1.89847	0.395	0.851	8	0.85
1706	-1.84969	-0.733532	-0.8587	-2.04953	-3.36553	0.582468	1.89847	0.395	0.851	8	0.85
1707	0.75575	-0.733532	-0.9064	-2.04953	-3.36553	0.582468	1.89847	0.395	0.851	9	0.85
1708	-0.98121	-0.733532	-0.9558	-2.04953	-3.36553	0.582468	1.89847	0.395	0.851	9	0.85
1709	-0.73662	-0.733532	-1.0056	-2.04953	-3.36553	0.582468	1.89847	0.395	0.851	9	0.85
1710	-0.13046	-0.733532	-1.0538	-2.04953	-3.36553	0.582468	1.89847	0.395	0.851	9	0.85
1711	-0.99185	-0.733532	-1.0978	-2.04953	-3.36553	0.582468	1.89847	0.395	0.851	9	0.85
1712	-2.61892	-0.733532	-1.1339	-2.04953	-3.36553	0.582468	1.89847	0.395	0.851	9	0.85
1713	-1.30734	-0.733532	-1.1586	-2.04953	-3.36553	0.582468	1.89847	0.395	0.851	9	0.85
1714	-2.20063	-0.733532	-1.1698	-2.04953	-3.36553	0.582468	1.89847	0.395	0.851	9	0.85
1715	-2.21127	-0.733532	-1.1664	-2.04953	-3.36553	0.582468	1.89847	0.395	0.851	9	0.85
1716	-1.59092	-0.733532	-1.149	-2.04953	-3.36553	0.582468	1.89847	0.395	0.851	9	0.85
1717	-1.82843	-0.733532	-1.1194	-2.04953	-3.36553	0.582468	1.89847	0.395	0.851	9	0.85
1718	-0.55938	-0.733532	-1.0806	-2.04953	-3.36553	0.582468	1.89847	0.395	0.851	9	0.85
1719	-0.26162	-0.733532	-1.0365	-2.04953	-3.36553	0.582468	1.89847	0.395	0.851	9	0.85
1720	-0.61255	-0.733532	-0.9902	-2.04953	-3.36553	0.582468	1.89847	0.395	0.851	8	0.85
1721	-1.67245	-0.733532	-0.9437	-2.04953	-3.36553	0.582468	1.89847	0.395	0.851	8	0.85
1722	-1.08401	-0.733532	-0.8986	-2.04953	-3.36553	0.582468	1.89847	0.395	0.851	8	0.85
1723	-0.15882	-0.733532	-0.8574	-2.04953	-3.36553	0.582468	1.89847	0.395	0.851	8	0.85
1724	0.4828	-0.733532	-0.8225	-2.04953	-3.36553	0.582468	1.89847	0.395	0.851	8	0.85
1725	-0.29706	-0.733532	-0.7954	-2.04953	-3.36553	0.582468	1.89847	0.395	0.851	8	0.85
1726	-1.7079	-0.733532	-0.7759	-2.04953	-3.36553	0.582468	1.89847	0.391	0.885	7	0.85
1727	-0.18363	-0.733532	-0.7629	-2.04953	-3.36553	0.582468	1.89847	0.391	0.885	7	0.85
1728	-0.69408	-0.733532	-0.7563	-2.04953	-3.36553	0.582468	1.89847	0.391	0.885	7	0.85
1729	-0.61964	-0.733532	-0.7552	-2.04953	-3.36553	0.582468	1.89847	0.391	0.885	8	0.85
1730	-0.29706	-0.733532	-0.7589	-2.04953	-3.36553	0.582468	1.89847	0.391	0.885	9	0.85
1731	-1.01312	-0.733532	-0.7661	-2.04953	-3.36553	0.582468	1.89847	0.391	0.885	9	0.85
1732	0.79119	-0.733532	-0.7751	-2.04953	-3.36553	0.582468	1.89847	0.391	0.885	9	0.85
1733	-1.38178	-0.733532	-0.7838	-2.04953	-3.36553	0.582468	1.89847	0.391	0.885	9	0.85
1734	-1.06983	-0.733532	-0.7888	-2.04953	-3.36553	0.582468	1.89847	0.391	0.885	9	0.85
1735	-2.37787	-0.733532	-0.7869	-2.04953	-3.36553	0.582468	1.89847	0.391	0.885	9	0.85
1736	-1.77171	-0.733532	-0.7757	-2.04953	-3.36553	0.582468	1.89847	0.391	0.885	9	0.85
1737	-1.77171	-0.733532	-0.7552	-2.04953	-3.36553	0.582468	1.89847	0.391	0.885	9	0.85
1738	0.96135	-0.733532	-0.727	-2.04953	-3.36553	0.582468	1.89847	0.391	0.885	9	0.85
1739	0.57496	-0.733532	-0.6938	-2.04953	-3.36553	0.582468	1.89847	0.391	0.885	9	0.85
1740	-0.13755	-0.733532	-0.6563	-2.04953	-3.36553	0.582468	1.89847	0.391	0.885	9	0.85
1741	-2.11556	-0.733532	-0.6132	-2.04953	-3.36553	0.582468	1.89847	0.391	0.885	9	0.85
1742	-2.60829	-0.733532	-0.5627	-2.04953	-3.36553	0.582468	1.89847	0.391	0.885	9	0.85
1743	-2.68627	-0.733532	-0.5048	-2.04953	-3.36553	0.582468	1.89847	0.391	0.885	9	0.85
1744	-0.99894	-0.733532	-0.4434	-2.04953	-3.36553	0.582468	1.89847	0.391	0.885	9	0.85
1745	2.71603	-0.733532	-0.385	-2.04953	-3.36553	0.582468	1.89847	0.391	0.885	9	0.85
1746	-1.0592	-0.733532	-0.337	-2.04953	-3.36553	0.582468	1.89847	0.391	0.885	10	0.85
1747	2.00707	-0.733532	-0.3032	-2.04953	-3.36553	0.582468	1.89847	0.391	0.885	11	0.85
1748	1.26975	-0.733532	-0.287	-2.04953	-3.36553	0.582468	1.89847	0.391	0.885	11	0.85
1749	0.05387	-0.733532	-0.2889	-2.04953	-3.36553	0.582468	1.89847	0.391	0.885	11	0.85
1750	-0.1021	-0.733532	-0.3068	-2.04953	-3.36553	0.582468	1.89847	0.391	0.885	11	0.85
1751	-0.60546	-0.733532	-0.3379	-2.04953	-3.36553	0.582468	1.89847	0.445	0.925	13	0.85
1752	0.04324	-0.733532	-0.3789	-2.04953	-3.36553	0.582468	1.89847	0.445	0.925	14	0.85
1753	-0.6799	-0.733532	-0.4269	-2.04953	-3.36553	0.582468	1.89847	0.445	0.925	14	0.85
1754	-2.69336	-0.733532	-0.4784	-2.04953	-3.36553	0.582468	1.89847	0.445	0.925	14	0.85
1755	0.76284	-0.733532	-0.531	-2.04953	-3.36553	0.582468	1.89847	0.445	0.925	14	0.85
1756	-0.25453	-0.733532	-0.5841	-2.04953	-3.36553	0.582468	1.89847	0.445	0.925	15	0.85
1757	-1.03084	-0.733532	-0.6366	-2.04953	-3.36553	0.582468	1.89847	0.445	0.925	16	0.85
1758	-0.72244	-0.733532	-0.6864	-2.04953	-3.36553	0.582468	1.89847	0.445	0.925	16	0.85
1759	-0.33251	-0.733532	-0.7321	-2.04953	-3.36553	0.582468	1.89847	0.445	0.925	16	0.85
1760	-1.59447	-0.733532	-0.7721	-2.04953	-3.36553	0.582468	1.89847	0.445	0.925	15	0.85
1761	-1.80361	-0.733532	-0.8046	-2.04953	-3.36553	0.582468	1.89847	0.445	0.925	15	0.85
1762	-1.98085	-0.733532	-0.8291	-2.04953	-3.36553	0.582468	1.89847	0.445	0.925	15	0.85
1763	-2.16873	-0.733532	-0.8465	-2.04953	-3.36553	0.582468	1.89847	0.445	0.925	16	0.85
1764	0.05033	-0.733532	-0.8599	-2.04953	-3.36553	0.582468	1.89847	0.445	0.925	16	0.85
1765	-1.12301	-0.733532	-0.8738	-2.04953	-3.36553	0.582468	1.89847	0.445	0.925	16	0.85
1766	0.07869	-0.733532	-0.8922	-2.04953	-3.36553	0.582468	1.89847	0.445	0.925	16	0.85
1767	1.91845	-0.733532	-0.9187	-2.04953	-3.36553	0.582468	1.89847	0.445	0.925	17	0.85
1768	-0.27934	-0.733532	-0.9554	-2.04953	-3.36553	0.582468	1.89847	0.445	0.925	17	0.85
1769	-1.38178	-0.733532	-1.0003	-2.04953	-3.36553	0.582468	1.89847	0.445	0.925	17	0.85
1770	-0.78625	-0.733532	-1.0503	-2.04953	-3.36553	0.582468	1.89847	0.445	0.925	15	0.85
1771	-1.67245	-0.733532	-1.1024	-2.04953	-3.36553	0.582468	1.89847	0.445	0.925	15	0.85
1772	-1.10528	-0.733532	-1.1535	-2.04953	-3.36553	0.582468	1.89847	0.445	0.925	14	0.85
1773	-0.63028	-0.733532	-1.201	-2.04953	-3.36553	0.582468	1.89847	0.445	0.925	14	0.85
1774	-0.14464	-0.733532	-1.2423	-2.04953	-3.36553	0.582468	1.89847	0.445	0.925	14	0.85
1775	-2.55866	-0.733532	-1.274	-2.04953	-3.36553	0.582468	1.89847	0.445	0.925	14	0.85
1776	-3.88442	-0.733532	-1.2915	-2.04953	-3.36553	0.582468	1.89847	0.57	0.958	14	0.85
1777	-2.01276	-0.733532	-1.292	-2.04953	-3.36553	0.582468	1.89847	0.57	0.958	14	0.85
1778	-1.57674	-0.733532	-1.2763	-2.04953	-3.36553	0.582468	1.89847	0.57	0.958	14	0.85
1779	-2.03757	-0.733532	-1.2468	-2.04953	-3.36553	0.582468	1.89847	0.57	0.958	14	0.85
1780	-0.44595	-0.733532	-1.2066	-2.04953	-3.36553	0.582468	1.89847	0.57	0.958	15	0.85
1781	0.95426	-0.733532	-1.1597	-2.04953	-3.36553	0.582468	1.89847	0.57	0.958	15	0.85
1782	0.87982	-0.733532	-1.1088	-2.04953	-3.36553	0.582468	1.89847	0.57	0.958	15	0.85
1783	-5.12156	-0.733532	-1.0534	-2.04953	-3.36553	0.582468	1.89847	0.57	0.958	15	0.85
1784	0.53951	-0.733532	-0.9914	-2.04953	-3.36553	0.582468	1.89847	0.57	0.958	15	0.85
1785	-1.00957	-0.733532	-0.9241	-2.04953	-3.36553	0.582468	1.89847	0.57	0.958	15	0.85
1786	-1.66536	-0.733532	-0.8525	-2.04953	-3.36553	0.582468	1.89847	0.57	0.958	15	0.85
1787	-0.78625	-0.733532	-0.7774	-2.04953	-3.36553	0.582468	1.89847	0.57	0.958	16	0.85
1788	-0.72599	-0.733532	-0.7005	-2.04953	-3.36553	0.582468	1.89847	0.57	0.958	16	0.85
1789	-1.14428	-0.733532	-0.6238	-2.04953	-3.36553	0.582468	1.89847	0.57	0.958	16	0.85
1790	-1.1939	-0.733532	-0.5493	-2.04953	-3.36553	0.582468	1.89847	0.57	0.958	16	0.85
1791	-1.36051	-0.733532	-0.48	-2.04953	-3.36553	0.582468	1.89847	0.57	0.958	16	0.85
1792	0.07514	-0.733532	-0.42	-2.04953	-3.36553	0.582468	1.89847	0.57	0.958	17	0.85
1793	0.75575	-0.733532	-0.3742	-2.04953	-3.36553	0.582468	1.89847	0.57	0.958	18	0.85
1794	-0.25453	-0.733532	-0.3473	-2.04953	-3.36553	0.582468	1.89847	0.57	0.958	18	0.85
1795	1.84046	-0.733532	-0.3421	-2.04953	-3.36553	0.582468	1.89847	0.57	0.958	18	0.85
1796	1.71994	-0.733532	-0.3606	-2.04953	-3.36553	0.582468	1.89847	0.57	0.958	18	0.85
1797	-0.64446	-0.733532	-0.4017	-2.04953	-3.36553	0.582468	1.89847	0.57	0.958	18	0.85
1798	-0.07374	-0.733532	-0.4615	-2.04953	-3.36553	0.582468	1.89847	0.57	0.958	18	0.85
1799	-2.85642	-0.733532	-0.5356	-2.04953	-3.36553	0.582468	1.89847	0.57	0.958	18	0.85
1800	-0.2758	-0.733532	-0.6198	-2.04953	-3.36553	0.582468	1.89847	0.57	0.958	19	0.85
1801	-0.78979	-0.733532	-0.7124	-2.04953	-3.36553	0.582468	1.89847	0.441	0.938	19	0.85
1802	-0.69408	-0.733532	-0.8119	-2.04953	-3.36553	0.582468	1.89847	0.441	0.938	19	0.85
1803	-0.50975	-0.733532	-0.917	-2.04953	-3.36553	0.582468	1.89847	0.441	0.938	19	0.85
1804	0.42253	-0.733532	-1.026	-2.04953	-3.36553	0.582468	1.89847	0.441	0.938	19	0.85
1805	0.5466	-0.733532	-1.1361	-2.04953	-3.36553	0.582468	1.89847	0.441	0.938	19	0.85
1806	-2.50903	-0.733532	-1.2427	-2.04953	-3.36553	0.582468	1.89847	0.441	0.938	19	0.85
1807	-1.24353	-0.733532	-1.3389	-2.04953	-3.36553	0.582468	1.89847	0.441	0.938	19	0.85
1808	-3.59374	-0.733532	-1.419	-2.04953	-3.36553	0.582468	1.89847	0.441	0.938	19	0.85
1809	-3.2818	-0.733532	-1.4779	-2.04953	-3.36553	0.582468	1.89847	0.441	0.938	19	0.85
1810	-4.21763	-0.733532	-1.5137	-2.04953	-3.36553	0.582468	1.89847	0.441	0.938	19	0.85
1811	-1.81425	-0.733532	-1.5276	-2.04953	-3.36553	0.582468	1.89847	0.441	0.938	19	0.85
1812	-1.83906	-0.733532	-1.5247	-2.04953	-3.36553	0.582468	1.89847	0.441	0.938	19	0.85
1813	-1.21872	-0.733532	-1.5111	-2.04953	-3.36553	0.582468	1.89847	0.441	0.938	19	0.85
1814	-0.69408	-0.733532	-1.4933	-2.04953	-3.36553	0.582468	1.89847	0.441	0.938	19	0.85
1815	0.36936	-0.733532	-1.4775	-2.04953	-3.36553	0.582468	1.89847	0.441	0.938	19	0.85
1816	0.62813	-0.733532	-1.4681	-2.04953	-3.36553	0.582468	1.89847	0.441	0.938	19	0.85
1817	-0.94222	-0.733532	-1.4668	-2.04953	-3.36553	0.582468	1.89847	0.441	0.938	18	0.85
1818	-3.08684	-0.733532	-1.4722	-2.04953	-3.36553	0.582468	1.89847	0.441	0.938	19	0.85
1819	-1.78589	-0.733532	-1.4822	-2.04953	-3.36553	0.582468	1.89847	0.441	0.938	19	0.85
1820	-1.8426	-0.733532	-1.4966	-2.04953	-3.36553	0.582468	1.89847	0.441	0.938	18	0.85
1821	-1.16554	-0.733532	-1.5157	-2.04953	-3.36553	0.582468	1.89847	0.441	0.938	18	0.85
1822	-1.06274	-0.733532	-1.5407	-2.04953	-3.36553	0.582468	1.89847	0.441	0.938	18	0.85
1823	-0.82524	-0.733532	-1.5719	-2.04953	-3.36553	0.582468	1.89847	0.441	0.938	18	0.85
1824	-0.98476	-0.733532	-1.609	-2.04953	-3.36553	0.582468	1.89847	0.441	0.938	18	0.85
1825	-0.62673	-0.733532	-1.6506	-2.04953	-3.36553	0.582468	1.89847	0.441	0.938	18	0.85
1826	-1.78234	-0.733532	-1.6938	-2.04953	-3.36553	0.582468	1.89847	0.349	0.924	19	0.85
1827	-0.57356	-0.733532	-1.7349	-2.04953	-3.36553	0.582468	1.89847	0.349	0.924	19	0.85
1828	-1.98085	-0.733532	-1.7691	-2.04953	-3.36553	0.582468	1.89847	0.349	0.924	19	0.85
1829	-4.28853	-0.733532	-1.7908	-2.04953	-3.36553	0.582468	1.89847	0.349	0.924	19	0.85
1830	-3.10102	-0.733532	-1.7949	-2.04953	-3.36553	0.582468	1.89847	0.349	0.924	19	0.85
1831	-3.18609	-0.733532	-1.7794	-2.04953	-3.36553	0.582468	1.89847	0.349	0.924	19	0.85
1832	-1.72208	-0.733532	-1.7451	-2.04953	-3.36553	0.582468	1.89847	0.349	0.924	19	0.85
1833	-0.70826	-0.733532	-1.6946	-2.04953	-3.36553	0.582468	1.89847	0.349	0.924	19	0.85
1834	-0.9245	-0.733532	-1.6306	-2.04953	-3.36553	0.582468	1.89847	0.349	0.924	19	0.85
1835	-0.85715	-0.733532	-1.5545	-2.04953	-3.36553	0.582468	1.89847	0.349	0.924	19	0.85
1836	-2.93086	-0.733532	-1.4665	-2.04953	-3.36553	0.582468	1.89847	0.349	0.924	19	0.85
1837	-1.59092	-0.733532	-1.3661	-2.04953	-3.36553	0.582468	1.89847	0.349	0.924	19	0.85
1838	-1.53066	-0.733532	-1.2543	-2.04953	-3.36553	0.582468	1.89847	0.349	0.924	19	0.85
1839	-1.43495	-0.733532	-1.1331	-2.04953	-3.36553	0.582468	1.89847	0.349	0.924	19	0.85
1840	-1.01666	-0.733532	-1.0047	-2.04953	-3.36553	0.582468	1.89847	0.349	0.924	20	0.85
1841	-1.51294	-0.733532	-0.8718	-2.04953	-3.36553	0.582468	1.89847	0.349	0.924	20	0.85
1842	-0.41404	-0.733532	-0.7373	-2.04953	-3.36553	0.582468	1.89847	0.349	0.924	20	0.85
1843	0.42253	-0.733532	-0.605	-2.04953	-3.36553	0.582468	1.89847	0.349	0.924	21	0.85
1844	-0.54166	-0.733532	-0.4779	-2.04953	-3.36553	0.582468	1.89847	0.349	0.924	21	0.85
1845	-1.18681	-0.733532	-0.358	-2.04953	-3.36553	0.582468	1.89847	0.349	0.924	21	0.85
1846	-0.52748	-0.733532	-0.2472	-2.04953	-3.36553	0.582468	1.89847	0.349	0.924	21	0.85
1847	-0.93159	-0.733532	-0.1484	-2.04953	-3.36553	0.582468	1.89847	0.349	0.924	21	0.85
1848	0.41899	-0.733532	-0.0654	-2.04953	-3.36553	0.582468	1.89847	0.349	0.924	21	0.85
1849	1.01097	-0.733532	-0.0027	-2.04953	-3.36553	0.582468	1.89847	0.349	0.924	23	0.85
1850	1.17758	-0.733532	0.0357	-2.04953	-3.36553	0.582468	1.89847	0.349	0.924	23	0.85
1851	0.78056	-0.733532	0.0475	-2.04953	-3.36553	0.582468	1.89847	0.453	0.961	23	0.85
1852	0.99679	-0.733532	0.0321	-2.04953	-3.36553	0.582468	1.89847	0.453	0.961	24	0.85
1853	0.91881	-0.733532	-0.0097	-2.04953	-3.36553	0.582468	1.89847	0.453	0.961	25	0.85
1854	0.0007	-0.733532	-0.0753	-2.04953	-3.36553	0.582468	1.89847	0.453	0.961	25	0.85
1855	0.71675	-0.733532	-0.1612	-2.04953	-3.36553	0.582468	1.89847	0.453	0.961	26	0.85
1856	0.61041	-0.733532	-0.263	-2.04953	-3.36553	0.582468	1.89847	0.453	0.961	26	0.85
1857	-0.85715	-0.733532	-0.375	-2.04953	-3.36553	0.582468	1.89847	0.453	0.961	26	0.85
1858	-0.92804	-0.733532	-0.4906	-2.04953	-3.36553	0.582468	1.89847	0.453	0.961	26	0.85
1859	-1.61574	-0.733532	-0.6035	-2.04953	-3.36553	0.582468	1.89847	0.453	0.961	26	0.85
1860	-0.87841	-0.733532	-0.7084	-2.04953	-3.36553	0.582468	1.89847	0.453	0.961	26	0.85
1861	-1.87805	-0.733532	-0.8012	-2.04953	-3.36553	0.582468	1.89847	0.453	0.961	26	0.85
1862	-2.20418	-0.733532	-0.8787	-2.04953	-3.36553	0.582468	1.89847	0.453	0.961	26	0.85
1863	-1.31443	-0.733532	-0.9393	-2.04953	-3.36553	0.582468	1.89847	0.453	0.961	26	0.85
1864	-1.2329	-0.733532	-0.9831	-2.04953	-3.36553	0.582468	1.89847	0.453	0.961	26	0.85
1865	-0.86069	-0.733532	-1.0114	-2.04953	-3.36553	0.582468	1.89847	0.453	0.961	26	0.85
1866	-1.18681	-0.733532	-1.0256	-2.04953	-3.36553	0.582468	1.89847	0.453	0.961	27	0.85
1867	-0.75435	-0.733532	-1.0272	-2.04953	-3.36553	0.582468	1.89847	0.453	0.961	27	0.85
1868	-1.22226	-0.733532	-1.0176	-2.04953	-3.36553	0.582468	1.89847	0.453	0.961	27	0.85
1869	-0.72599	-0.733532	-0.9981	-2.04953	-3.36553	0.582468	1.89847	0.453	0.961	26	0.85
1870	-0.69763	-0.733532	-0.97	-2.04953	-3.36553	0.582468	1.89847	0.453	0.961	26	0.85
1871	-1.80716	-0.733532	-0.9345	-2.04953	-3.36553	0.582468	1.89847	0.453	0.961	26	0.85
1872	-0.14109	-0.733532	-0.8924	-2.04953	-3.36553	0.582468	1.89847	0.453	0.961	26	0.85							-0.12319	-0.12319	-0.12319	-0.12319	-0.12319	-0.12319
1873	-0.80752	-0.733532	-0.8452	-2.04953	-3.36553	0.582468	1.89847	0.453	0.961	26	0.85							-0.1752	-0.1752	-0.1752	-0.1752	-0.1752	-0.1752
1874	-0.77916	-0.733532	-0.7941	-2.04953	-3.36553	0.582468	1.89847	0.453	0.961	26	0.85							0.02357	0.02357	0.02357	0.02357	0.02357	0.02357
1875	0.81955	-0.733532	-0.7396	-2.04953	-3.36553	0.582468	1.89847	0.453	0.961	26	0.85							0.0858	0.0858	0.0858	0.0858	0.0858	0.0858
1876	-1.53066	-0.733532	-0.6821	-2.04953	-3.36553	0.582468	1.89847	0.554	0.979	27	0.85							-0.18449	-0.18449	-0.18449	-0.18449	-0.18449	-0.18449
1877	-0.79688	-0.733532	-0.6202	-2.04953	-3.36553	0.582468	1.89847	0.554	0.979	28	0.85							0.18797	0.18797	0.18797	0.18797	0.18797	0.18797
1878	0.68485	-0.733532	-0.5534	-2.04953	-3.36553	0.582468	1.89847	0.554	0.979	29	0.85							0.44619	0.44619	0.44619	0.44619	0.44619	0.44619
1879	-1.37114	-0.733532	-0.4809	-2.04953	-3.36553	0.582468	1.89847	0.554	0.979	30	0.85							-0.61083	-0.61083	-0.61083	-0.61083	-0.61083	-0.61083
1880	-5.38388	-0.733532	-0.4011	-2.04953	-3.36553	0.582468	1.89847	0.554	0.979	31	0.85							0.65332	0.65332	0.65332	0.65332	0.65332	0.65332
1881	1.35482	-0.733532	-0.3144	-2.04953	-3.36553	0.582468	1.89847	0.554	0.979	31	0.85							0.61616	0.61616	0.61616	0.61616	0.61616	0.61616
1882	2.61678	-0.733532	-0.2264	-2.04953	-3.36553	0.582468	1.89847	0.554	0.979	32	0.85							0.46476	0.46476	0.46476	0.46476	0.46476	0.46476
1883	0.38354	-0.733532	-0.1416	-2.04953	-3.36553	0.582468	1.89847	0.554	0.979	33	0.85							0.26878	0.26878	0.26878	0.26878	0.26878	0.26878
1884	1.57105	-0.733532	-0.0607	-2.04953	-3.36553	0.582468	1.89847	0.554	0.979	33	0.85							-0.35725	-0.35725	-0.35725	-0.35725	-0.35725	-0.35725
1885	-0.58774	-0.733532	0.0175	-2.04953	-3.36553	0.582468	1.89847	0.554	0.979	34	0.85							-0.1492	-0.1492	-0.1492	-0.1492	-0.1492	-0.1492
1886	-1.676	-0.733532	0.0961	-2.04953	-3.36553	0.582468	1.89847	0.554	0.979	34	0.85							0.04772	0.04772	0.04772	0.04772	0.04772	0.04772
1887	0.58205	-0.733532	0.1772	-2.04953	-3.36553	0.582468	1.89847	0.554	0.979	35	0.85							-0.38605	-0.38605	-0.38605	-0.38605	-0.38605	-0.38605
1888	-1.54484	-0.733532	0.2613	-2.04953	-3.36553	0.582468	1.89847	0.554	0.979	35	0.85							-0.3554	-0.3554	-0.3554	-0.3554	-0.3554	-0.3554
1889	0.77702	-0.733532	0.348	-2.04953	-3.36553	0.582468	1.89847	0.554	0.979	35	0.85							-0.11111	-0.11111	-0.11111	-0.11111	-0.11111	-0.11111
1890	0.5147	-0.733532	0.4351	-2.04953	-3.36553	0.582468	1.89847	0.554	0.979	36	0.85							0.01149	0.01149	0.01149	0.01149	0.01149	0.01149
1891	-0.5452	-0.733532	0.5206	-2.04953	-3.36553	0.582468	1.89847	0.554	0.979	36	0.85							0.21119	0.21119	0.21119	0.21119	0.21119	0.21119
1892	1.1634	-0.733532	0.6022	-2.04953	-3.36553	0.582468	1.89847	0.554	0.979	36	0.85							0.08766	0.08766	0.08766	0.08766	0.08766	0.08766
1893	2.54234	-0.733532	0.6768	-2.04953	-3.36553	0.582468	1.89847	0.554	0.979	36	0.85							0.25485	0.25485	0.25485	0.25485	0.25485	0.25485
1894	0.16376	-0.733532	0.7421	-2.04953	-3.36553	0.582468	1.89847	0.554	0.979	37	0.85							0.00499	0.00499	0.00499	0.00499	0.00499	0.00499
1895	-0.8855	-0.733532	0.7976	-2.04953	-3.36553	0.582468	1.89847	0.554	0.979	37	0.85							0.58923	0.58923	0.58923	0.58923	0.58923	0.58923
1896	-0.1021	-0.733532	0.8426	-2.04953	-3.36553	0.582468	1.89847	0.554	0.979	37	0.85							-0.67677	-0.67677	-0.67677	-0.67677	-0.67677	-0.67677
1897	2.26584	-0.733532	0.8739	-2.04953	-3.36553	0.582468	1.89847	0.554	0.979	37	0.85							0.35981	0.35981	0.35981	0.35981	0.35981	0.35981
1898	0.69194	-0.733532	0.8872	-2.04953	-3.36553	0.582468	1.89847	0.554	0.979	38	0.85							-0.08511	-0.08511	-0.08511	-0.08511	-0.08511	-0.08511
1899	3.02798	-0.733532	0.8793	-2.04953	-3.36553	0.582468	1.89847	0.554	0.979	39	0.85							0.45083	0.45083	0.45083	0.45083	0.45083	0.45083
1900	1.37609	-0.733532	0.848	-2.04953	-3.36553	0.582468	1.89847	0.554	0.979	39	0.85							-0.60432	-0.60432	-0.60432	-0.60432	-0.60432	-0.60432
1901	1.60296	-0.733532	0.7934	-2.04953	-3.36553	0.582468	1.89847	0.516	0.981	39	0.85							0.77778	0.77778	0.77778	0.77778	0.77778	0.77778
1902	0.855	-0.733532	0.7173	-2.04953	-3.36553	0.582468	1.89847	0.516	0.981	39	0.85							-0.02659	-0.02659	-0.02659	-0.02659	-0.02659	-0.02659
1903	0.92944	-0.733532	0.6222	-2.04953	-3.36553	0.582468	1.89847	0.516	0.981	40	0.85							-0.07582	-0.07582	-0.07582	-0.07582	-0.07582	-0.07582
1904	0.04324	-0.733532	0.5115	-2.04953	-3.36553	0.582468	1.89847	0.516	0.981	40	0.85							-0.09347	-0.09347	-0.09347	-0.09347	-0.09347	-0.09347
1905	-0.2049	-0.733532	0.3885	-2.04953	-3.36553	0.582468	1.89847	0.516	0.981	41	0.85							0.15825	0.15825	0.15825	0.15825	0.15825	0.15825
1906	-0.36087	-0.733532	0.2561	-2.04953	-3.36553	0.582468	1.89847	0.516	0.981	41	0.85							0.42204	0.42204	0.42204	0.42204	0.42204	0.42204
1907	2.30838	-0.733532	0.1162	-2.04953	-3.36553	0.582468	1.89847	0.516	0.981	41	0.85							-0.64334	-0.64334	-0.64334	-0.64334	-0.64334	-0.64334
1908	0.56078	-0.733532	-0.0296	-2.04953	-3.36553	0.582468	1.89847	0.516	0.981	41	0.85							-0.20214	-0.20214	-0.20214	-0.20214	-0.20214	-0.20214
1909	-1.1301	-0.733532	-0.1773	-2.04953	-3.36553	0.582468	1.89847	0.516	0.981	41	0.85							0.07187	0.07187	0.07187	0.07187	0.07187	0.07187
1910	-0.27934	-0.733532	-0.3217	-2.04953	-3.36553	0.582468	1.89847	0.516	0.981	40	0.85							0.11366	0.11366	0.11366	0.11366	0.11366	0.11366
1911	-1.02375	-0.733532	-0.4587	-2.04953	-3.36553	0.582468	1.89847	0.516	0.981	40	0.85							-0.4232	-0.4232	-0.4232	-0.4232	-0.4232	-0.4232
1912	0.42962	-0.733532	-0.5843	-2.04953	-3.36553	0.582468	1.89847	0.516	0.981	40	0.85							0.24463	0.24463	0.24463	0.24463	0.24463	0.24463
1913	-0.91741	-0.733532	-0.6953	-2.04953	-3.36553	0.582468	1.89847	0.516	0.981	40	0.85							-0.43528	-0.43528	-0.43528	-0.43528	-0.43528	-0.43528
1914	0.20984	-0.733532	-0.787	-2.04953	-3.36553	0.582468	1.89847	0.516	0.981	40	0.85							0.29572	0.29572	0.29572	0.29572	0.29572	0.29572
1915	-1.84615	-0.733532	-0.8549	-2.04953	-3.36553	0.582468	1.89847	0.516	0.981	40	0.85							0.57901	0.57901	0.57901	0.57901	0.57901	0.57901
1916	-1.8816	-0.733532	-0.8934	-2.04953	-3.36553	0.582468	1.89847	0.516	0.981	40	0.85							-0.42599	-0.42599	-0.42599	-0.42599	-0.42599	-0.42599
1917	-5.44768	-0.733532	-0.8981	-2.04953	-3.36553	0.582468	1.89847	0.516	0.981	40	0.85							-0.12969	-0.12969	-0.12969	-0.12969	-0.12969	-0.12969
1918	-4.19991	-0.733532	-0.8674	-2.04953	-3.36553	0.582468	1.89847	0.516	0.981	41	0.85							-0.27459	-0.27459	-0.27459	-0.27459	-0.27459	-0.27459
1919	-2.8387	-0.733532	-0.8058	-2.04953	-3.36553	0.582468	1.89847	0.516	0.981	43	0.85							-0.15105	-0.15105	-0.15105	-0.15105	-0.15105	-0.15105
1920	-0.76144	-0.733532	-0.7236	-2.04953	-3.36553	0.582468	1.89847	0.516	0.981	44	0.85							0.25578	0.25578	0.25578	0.25578	0.25578	0.25578
1921	1.51434	-0.733532	-0.6342	-2.04953	-3.36553	0.582468	1.89847	0.516	0.981	45	0.85							-0.42134	-0.42134	-0.42134	-0.42134	-0.42134	-0.42134
1922	2.19494	-0.733532	-0.5511	-2.04953	-3.36553	0.582468	1.89847	0.516	0.981	47	0.85							0.23627	0.23627	0.23627	0.23627	0.23627	0.23627
1923	1.92908	-0.733532	-0.4846	-2.04953	-3.36553	0.582468	1.89847	0.516	0.981	47	0.85							-0.09718	-0.09718	-0.09718	-0.09718	-0.09718	-0.09718
1924	2.62032	-0.733532	-0.4405	-2.04953	-3.36553	0.582468	1.89847	0.516	0.981	47	0.85							-0.17799	-0.17799	-0.17799	-0.17799	-0.17799	-0.17799
1925	0.69903	-0.733532	-0.4205	-2.04953	-3.36553	0.582468	1.89847	0.516	0.981	49	0.85							-0.29224	-0.29224	-0.29224	-0.29224	-0.29224	-0.29224
1926	-0.65509	-0.733532	-0.4217	-2.04953	-3.36553	0.582468	1.89847	0.334	0.972	49	0.85							-0.14084	-0.14084	-0.14084	-0.14084	-0.14084	-0.14084
1927	-3.06557	-0.733532	-0.4391	-2.04953	-3.36553	0.582468	1.89847	0.334	0.972	50	0.85							-0.19192	-0.19192	-0.19192	-0.19192	-0.19192	-0.19192
1928	-0.73308	-0.733532	-0.4686	-2.04953	-3.36553	0.582468	1.89847	0.334	0.972	51	0.85							-0.09718	-0.09718	-0.09718	-0.09718	-0.09718	-0.09718
1929	-0.09146	-0.733532	-0.5089	-2.04953	-3.36553	0.582468	1.89847	0.334	0.972	51	0.85							-0.27923	-0.27923	-0.27923	-0.27923	-0.27923	-0.27923
1930	0.80892	-0.733532	-0.5599	-2.04953	-3.36553	0.582468	1.89847	0.334	0.972	51	0.85							-0.29409	-0.29409	-0.29409	-0.29409	-0.29409	-0.29409
1931	-0.18717	-0.733532	-0.6205	-2.04953	-3.36553	0.582468	1.89847	0.334	0.972	52	0.85							0.07187	0.07187	0.07187	0.07187	0.07187	0.07187
1932	-0.19781	-0.733532	-0.688	-2.04953	-3.36553	0.582468	1.89847	0.334	0.972	52	0.85
1933	-2.20418	-0.733532	-0.7585	-2.04953	-3.36553	0.582468	1.89847	0.334	0.972	52	0.85
1934	-0.16591	-0.733532	-0.828	-2.04953	-3.36553	0.582468	1.89847	0.334	0.972	52	0.85
1935	-0.78625	-0.733532	-0.8938	-2.04953	-3.36553	0.582468	1.89847	0.334	0.972	52	0.85
1936	-0.81461	-0.733532	-0.9526	-2.04953	-3.36553	0.582468	1.89847	0.334	0.972	55	0.85
1937	-1.05211	-0.733532	-1.0011	-2.04953	-3.36553	0.582468	1.89847	0.334	0.972	57	0.85
1938	-2.06593	-0.733532	-1.0355	-2.04953	-3.36553	0.582468	1.89847	0.334	0.972	57	0.85
1939	-3.15064	-0.733532	-1.0526	-2.04953	-3.36553	0.582468	1.89847	0.334	0.972	57	0.85
1940	-2.67209	-0.733532	-1.0508	-2.04953	-3.36553	0.582468	1.89847	0.334	0.972	58	0.85
1941	-2.27507	-0.733532	-1.0316	-2.04953	-3.36553	0.582468	1.89847	0.334	0.972	59	0.85
1942	-0.47076	-0.733532	-0.9993	-2.04953	-3.36553	0.582468	1.89847	0.334	0.972	60	0.85
1943	-0.20844	-0.733532	-0.9598	-2.04953	-3.36553	0.582468	1.89847	0.334	0.972	61	0.85
1944	-0.86424	-0.733532	-0.9189	-2.04953	-3.36553	0.582468	1.89847	0.334	0.972	62	0.85
1945	0.19212	-0.733532	-0.8809	-2.04953	-3.36553	0.582468	1.89847	0.334	0.972	62	0.85
1946	-0.05247	-0.733532	-0.8498	-2.04953	-3.36553	0.582468	1.89847	0.334	0.972	64	0.85
1947	0.40481	-0.733532	-0.8282	-2.04953	-3.36553	0.582468	1.89847	0.334	0.972	64	0.85
1948	-0.73308	-0.733532	-0.8171	-2.04953	-3.36553	0.582468	1.89847	0.334	0.972	64	0.85
1949	-0.64446	-0.733532	-0.8157	-2.04953	-3.36553	0.582468	1.89847	0.334	0.972	65	0.85
1950	-1.64764	-0.733532	-0.8229	-2.04953	-3.36553	0.582468	1.89847	0.334	0.972	66	0.85
1951	-0.39986	-0.733532	-0.8376	-2.04953	-3.36553	0.582468	1.89847	0.3	0.976	68	0.85
1952	-0.2049	-0.733532	-0.8594	-2.04953	-3.36553	0.582468	1.89847	0.3	0.976	69	0.85
1953	-0.8217	-0.733532	-0.8874	-2.04953	-3.36553	0.582468	1.89847	0.3	0.976	69	0.85
1954	-0.71535	-0.733532	-0.9199	-2.04953	-3.36553	0.582468	1.89847	0.3	0.976	71	0.85
1955	-0.9564	-0.733532	-0.955	-2.04953	-3.36553	0.582468	1.89847	0.3	0.976	71	0.85
1956	-1.4385	-0.733532	-0.9904	-2.04953	-3.36553	0.582468	1.89847	0.3	0.976	71	0.85
1957	-0.9883	-0.733532	-1.0238	-2.04953	-3.36553	0.582468	1.89847	0.3	0.976	71	0.85
1958	-0.93159	-0.733532	-1.0535	-2.04953	-3.36553	0.582468	1.89847	0.3	0.976	71	0.85
1959	-1.53066	-0.733532	-1.0779	-2.04953	-3.36553	0.582468	1.89847	0.3	0.976	74	0.85
1960	-1.56256	-0.733532	-1.0954	-2.04953	-3.36553	0.582468	1.89847	0.3	0.976	81	0.85
1961	-2.07656	-0.733532	-1.1048	-2.04953	-3.36553	0.582468	1.89847	0.3	0.976	83	0.85
1962	-1.52712	-0.733532	-1.106	-2.04953	-3.36553	0.582468	1.89847	0.3	0.976	85	0.85
1963	-1.34633	-0.733532	-1.1003	-2.04953	-3.36553	0.582468	1.89847	0.3	0.976	86	0.85
1964	-1.82134	-0.733532	-1.0895	-2.04953	-3.36553	0.582468	1.89847	0.3	0.976	88	0.85
1965	-1.66182	-0.733532	-1.0765	-2.04953	-3.36553	0.582468	1.89847	0.3	0.976	90	0.85
1966	-0.25453	-0.733532	-1.0648	-2.04953	-3.36553	0.582468	1.89847	0.3	0.976	91	0.85
1967	-0.82524	-0.733532	-1.0587	-2.04953	-3.36553	0.582468	1.89847	0.3	0.976	94	0.85
1968	0.39418	-0.733532	-1.0618	-2.04953	-3.36553	0.582468	1.89847	0.3	0.976	94	0.85
1969	0.56433	-0.733532	-1.0766	-2.04953	-3.36553	0.582468	1.89847	0.3	0.976	97	0.85
1970	-0.27225	-0.733532	-1.1036	-2.04953	-3.36553	0.582468	1.89847	0.3	0.976	100	0.85
1971	-0.59483	-0.733532	-1.1408	-2.04953	-3.36553	0.582468	1.89847	0.3	0.976	100	0.85
1972	-0.03475	-0.733532	-1.1845	-2.04953	-3.36553	0.582468	1.89847	0.3	0.976	101	0.85
1973	-1.58738	-0.733532	-1.23	-2.04953	-3.36553	0.582468	1.89847	0.3	0.976	101	0.85
1974	-3.03366	-0.733532	-1.2712	-2.04953	-3.36553	0.582468	1.89847	0.3	0.976	102	0.85
1975	-3.24281	-0.733532	-1.3024	-2.04953	-3.36553	0.582468	1.89847	0.3	0.976	103	0.85
1976	-1.93831	-0.733532	-1.3208	-2.04953	-3.36553	0.582468	1.89847			104	0.85
1977	-2.00921	-0.733532	-1.3263	-2.04953	-3.36553	0.582468	1.89847			104	0.85
1978	-1.27898	-0.733532	-1.3204	-2.04953	-3.36553	0.582468	1.89847			104	0.85
1979	-0.63382	-0.733532	-1.3052	-2.04953	-3.36553	0.582468	1.89847			107	0.85
1980	-0.648	-0.733532	-1.2831	-2.04953	-3.36553	0.582468	1.89847			109	0.85
1981	0.50761	-0.733532	-1.2553	-2.04953	-3.36553	0.582468	1.89847			109	0.85
1982	-2.57284	-0.733532	-1.2218	-2.04953	-3.36553	0.582468	1.89847			109	0.85
1983	-0.86069	-0.733532	-1.1806	-2.04953	-3.36553	0.582468	1.89847			109	0.85
1984	-1.09819	-0.733532	-1.131	-2.04953	-3.36553	0.582468	1.89847			109	0.85
1985	-1.07338	-0.733532	-1.0718	-2.04953	-3.36553	0.582468	1.89847			109	0.85
1986	-1.75044	-0.733532	-1.0021	-2.04953	-3.36553	0.582468	1.89847			109	0.85
1987	-0.65509	-0.733532	-0.9211	-2.04953	-3.36553	0.582468	1.89847			109	0.85
1988	-2.57993	-0.733532	-0.8286	-2.04953	-3.36553	0.582468	1.89847			109	0.85
1989	-2.42395	-0.733532	-0.725	-2.04953	-3.36553	0.582468	1.89847			109	0.85
1990	-1.4704	-0.733532	-0.6129	-2.04953	-3.36553	0.582468	1.89847			108	0.85
1991	-0.25807	-0.733532	-0.4977	-2.04953	-3.36553	0.582468	1.89847			108	0.85
1992	0.66713	-0.733532	-0.3861	-2.04953	-3.36553	0.582468	1.89847			108	0.85
1993	0.91526	-0.733532	-0.2846	-2.04953	-3.36553	0.582468	1.89847			108	0.85
1994	1.39381	-0.733532	-0.1978	-2.04953	-3.36553	0.582468	1.89847			108	0.85
1995	1.5037	-0.733532	-0.1285	-2.04953	-3.36553	0.582468	1.89847			108	0.85
1996	-0.52748	-0.733532	-0.0768	-2.04953	-3.36553	0.582468	1.89847			108	0.85
1997	-0.45304	-0.733532	-0.0408	-2.04953	-3.36553	0.582468	1.89847			108	0.85
1998	0.81601	-0.733532	-0.0184	-2.04953	-3.36553	0.582468	1.89847			108	0.85
1999	0.85855	-0.733532	-0.0082	-2.04953	-3.36553	0.582468	1.89847			108	0.85
2000	-2.40269	-0.733532	-0.0076	-2.04953	-3.36553	0.582468	1.89847			108	0.85
2001	-0.91741	-0.733532	-0.0135	-2.04953	-3.36553	0.582468	1.89847			108	0.85
2002	0.36582	-0.733532	-0.0254	-2.04953	-3.36553	0.582468	1.89847			108	0.85
2003	-0.02766	-0.733532	-0.0445	-2.04953	-3.36553	0.582468	1.89847			108	0.85
2004	-0.25807	-0.733532	-0.0719	-2.04953	-3.36553	0.582468	1.89847			108	0.85
2005	0.75929	-0.733532	-0.1083	-2.04953	-3.36553	0.582468	1.89847			108	0.85
2006	-0.09501	-0.733532	-0.1546	-2.04953	-3.36553	0.582468	1.89847			107	0.85
2007	0.60686	-0.733532	-0.2108	-2.04953	-3.36553	0.582468	1.89847			107	0.85
2008	-1.80361	-0.733532	-0.2762	-2.04953	-3.36553	0.582468	1.89847			107	0.85
2009	1.07478	-0.733532	-0.3497	-2.04953	-3.36553	0.582468	1.89847			107	0.85
2010	0.84082	-0.733532	-0.4313	-2.04953	-3.36553	0.582468	1.89847			107	0.85
2011	-2.2928	-0.733532	-0.5193	-2.04953	-3.36553	0.582468	1.89847			106	0.85
2012	-0.37859	-0.733532	-0.6109	-2.04953	-3.36553	0.582468	1.89847			101	0.85
2013	-0.86778	-0.733532	-0.7047	-2.04953	-3.36553	0.582468	1.89847			95	0.85
2014	-1.18681	-0.733532	-0.7996	-2.04953	-3.36553	0.582468	1.89847			90	0.85
2015	-1.03439	-0.733532	-0.8949	-2.04953	-3.36553	0.582468	1.89847			87	0.85
2016		-0.733532		-2.04953	-3.36553	0.582468	1.89847				0.85
2017		-0.733532		-2.04953	-3.36553	0.582468	1.89847				0.85
2018		-0.733532		-2.04953	-3.36553	0.582468	1.89847				0.85
2019		-0.733532		-2.04953	-3.36553	0.582468	1.89847				0.85
2020		-0.733532		-2.04953	-3.36553	0.582468	1.89847				0.85
	-0.733532
1901	1.60296	1.60296	1.60296	1.60296	1.60296	1.60296	1.60296	1.60296	1.60296	1.60296	1.60296	1.60296
1902	0.855	0.855	0.855	0.855	0.855	0.855	0.855	0.855	0.855	0.855	0.855	0.855
1903	0.92944	0.92944	0.92944	0.92944	0.92944	0.92944	0.92944	0.92944	0.92944	0.92944	0.92944	0.92944
1904	0.04324	0.04324	0.04324	0.04324	0.04324	0.04324	0.04324	0.04324	0.04324	0.04324	0.04324	0.04324
1905	-0.2049	-0.2049	-0.2049	-0.2049	-0.2049	-0.2049	-0.2049	-0.2049	-0.2049	-0.2049	-0.2049	-0.2049
1906	-0.36087	-0.36087	-0.36087	-0.36087	-0.36087	-0.36087	-0.36087	-0.36087	-0.36087	-0.36087	-0.36087	-0.36087
1907	2.30838	2.30838	2.30838	2.30838	2.30838	2.30838	2.30838	2.30838	2.30838	2.30838	2.30838	2.30838
1908	0.56078	0.56078	0.56078	0.56078	0.56078	0.56078	0.56078	0.56078	0.56078	0.56078	0.56078	0.56078
1909	-1.1301	-1.1301	-1.1301	-1.1301	-1.1301	-1.1301	-1.1301	-1.1301	-1.1301	-1.1301	-1.1301	-1.1301
1910	-0.27934	-0.27934	-0.27934	-0.27934	-0.27934	-0.27934	-0.27934	-0.27934	-0.27934	-0.27934	-0.27934	-0.27934
1911	-1.02375	-1.02375	-1.02375	-1.02375	-1.02375	-1.02375	-1.02375	-1.02375	-1.02375	-1.02375	-1.02375	-1.02375
1912	0.42962	0.42962	0.42962	0.42962	0.42962	0.42962	0.42962	0.42962	0.42962	0.42962	0.42962	0.42962
1913	-0.91741	-0.91741	-0.91741	-0.91741	-0.91741	-0.91741	-0.91741	-0.91741	-0.91741	-0.91741	-0.91741	-0.91741
1914	0.20984	0.20984	0.20984	0.20984	0.20984	0.20984	0.20984	0.20984	0.20984	0.20984	0.20984	0.20984
1915	-1.84615	-1.84615	-1.84615	-1.84615	-1.84615	-1.84615	-1.84615	-1.84615	-1.84615	-1.84615	-1.84615	-1.84615
1916	-1.8816	-1.8816	-1.8816	-1.8816	-1.8816	-1.8816	-1.8816	-1.8816	-1.8816	-1.8816	-1.8816	-1.8816
1917	-5.44768	-5.44768	-5.44768	-5.44768	-5.44768	-5.44768	-5.44768	-5.44768	-5.44768	-5.44768	-5.44768	-5.44768
1918	-4.19991	-4.19991	-4.19991	-4.19991	-4.19991	-4.19991	-4.19991	-4.19991	-4.19991	-4.19991	-4.19991	-4.19991
1919	-2.8387	-2.8387	-2.8387	-2.8387	-2.8387	-2.8387	-2.8387	-2.8387	-2.8387	-2.8387	-2.8387	-2.8387
1920	-0.76144	-0.76144	-0.76144	-0.76144	-0.76144	-0.76144	-0.76144	-0.76144	-0.76144	-0.76144	-0.76144	-0.76144
1921	1.51434	1.51434	1.51434	1.51434	1.51434	1.51434	1.51434	1.51434	1.51434	1.51434	1.51434	1.51434
1922	2.19494	2.19494	2.19494	2.19494	2.19494	2.19494	2.19494	2.19494	2.19494	2.19494	2.19494	2.19494
1923	1.92908	1.92908	1.92908	1.92908	1.92908	1.92908	1.92908	1.92908	1.92908	1.92908	1.92908	1.92908
1924	2.62032	2.62032	2.62032	2.62032	2.62032	2.62032	2.62032	2.62032	2.62032	2.62032	2.62032	2.62032
1925	0.69903	0.69903	0.69903	0.69903	0.69903	0.69903	0.69903	0.69903	0.69903	0.69903	0.69903	0.69903
1926	-0.65509	-0.65509	-0.65509	-0.65509	-0.65509	-0.65509	-0.65509	-0.65509	-0.65509	-0.65509	-0.65509	-0.65509
1927	-3.06557	-3.06557	-3.06557	-3.06557	-3.06557	-3.06557	-3.06557	-3.06557	-3.06557	-3.06557	-3.06557	-3.06557
1928	-0.73308	-0.73308	-0.73308	-0.73308	-0.73308	-0.73308	-0.73308	-0.73308	-0.73308	-0.73308	-0.73308	-0.73308
1929	-0.09146	-0.09146	-0.09146	-0.09146	-0.09146	-0.09146	-0.09146	-0.09146	-0.09146	-0.09146	-0.09146	-0.09146
1930	0.80892	0.80892	0.80892	0.80892	0.80892	0.80892	0.80892	0.80892	0.80892	0.80892	0.80892	0.80892
1931	-0.18717	-0.18717	-0.18717	-0.18717	-0.18717	-0.18717	-0.18717	-0.18717	-0.18717	-0.18717	-0.18717	-0.18717
1932	-0.19781	-0.19781	-0.19781	-0.19781	-0.19781	-0.19781	-0.19781	-0.19781	-0.19781	-0.19781	-0.19781	-0.19781
1933	-2.20418	-2.20418	-2.20418	-2.20418	-2.20418	-2.20418	-2.20418	-2.20418	-2.20418	-2.20418	-2.20418	-2.20418
1934	-0.16591	-0.16591	-0.16591	-0.16591	-0.16591	-0.16591	-0.16591	-0.16591	-0.16591	-0.16591	-0.16591	-0.16591
1935	-0.78625	-0.78625	-0.78625	-0.78625	-0.78625	-0.78625	-0.78625	-0.78625	-0.78625	-0.78625	-0.78625	-0.78625
1936	-0.81461	-0.81461	-0.81461	-0.81461	-0.81461	-0.81461	-0.81461	-0.81461	-0.81461	-0.81461	-0.81461	-0.81461
1937	-1.05211	-1.05211	-1.05211	-1.05211	-1.05211	-1.05211	-1.05211	-1.05211	-1.05211	-1.05211	-1.05211	-1.05211
1938	-2.06593	-2.06593	-2.06593	-2.06593	-2.06593	-2.06593	-2.06593	-2.06593	-2.06593	-2.06593	-2.06593	-2.06593
1939	-3.15064	-3.15064	-3.15064	-3.15064	-3.15064	-3.15064	-3.15064	-3.15064	-3.15064	-3.15064	-3.15064	-3.15064
1940	-2.67209	-2.67209	-2.67209	-2.67209	-2.67209	-2.67209	-2.67209	-2.67209	-2.67209	-2.67209	-2.67209	-2.67209
1941	-2.27507	-2.27507	-2.27507	-2.27507	-2.27507	-2.27507	-2.27507	-2.27507	-2.27507	-2.27507	-2.27507	-2.27507
1942	-0.47076	-0.47076	-0.47076	-0.47076	-0.47076	-0.47076	-0.47076	-0.47076	-0.47076	-0.47076	-0.47076	-0.47076
1943	-0.20844	-0.20844	-0.20844	-0.20844	-0.20844	-0.20844	-0.20844	-0.20844	-0.20844	-0.20844	-0.20844	-0.20844
1944	-0.86424	-0.86424	-0.86424	-0.86424	-0.86424	-0.86424	-0.86424	-0.86424	-0.86424	-0.86424	-0.86424	-0.86424
1945	0.19212	0.19212	0.19212	0.19212	0.19212	0.19212	0.19212	0.19212	0.19212	0.19212	0.19212	0.19212
1946	-0.05247	-0.05247	-0.05247	-0.05247	-0.05247	-0.05247	-0.05247	-0.05247	-0.05247	-0.05247	-0.05247	-0.05247
1947	0.40481	0.40481	0.40481	0.40481	0.40481	0.40481	0.40481	0.40481	0.40481	0.40481	0.40481	0.40481
1948	-0.73308	-0.73308	-0.73308	-0.73308	-0.73308	-0.73308	-0.73308	-0.73308	-0.73308	-0.73308	-0.73308	-0.73308
1949	-0.64446	-0.64446	-0.64446	-0.64446	-0.64446	-0.64446	-0.64446	-0.64446	-0.64446	-0.64446	-0.64446	-0.64446
1950	-1.64764	-1.64764	-1.64764	-1.64764	-1.64764	-1.64764	-1.64764	-1.64764	-1.64764	-1.64764	-1.64764	-1.64764
1951	-0.39986	-0.39986	-0.39986	-0.39986	-0.39986	-0.39986	-0.39986	-0.39986	-0.39986	-0.39986	-0.39986	-0.39986
1952	-0.2049	-0.2049	-0.2049	-0.2049	-0.2049	-0.2049	-0.2049	-0.2049	-0.2049	-0.2049	-0.2049	-0.2049
1953	-0.8217	-0.8217	-0.8217	-0.8217	-0.8217	-0.8217	-0.8217	-0.8217	-0.8217	-0.8217	-0.8217	-0.8217
1954	-0.71535	-0.71535	-0.71535	-0.71535	-0.71535	-0.71535	-0.71535	-0.71535	-0.71535	-0.71535	-0.71535	-0.71535
1955	-0.9564	-0.9564	-0.9564	-0.9564	-0.9564	-0.9564	-0.9564	-0.9564	-0.9564	-0.9564	-0.9564	-0.9564
1956	-1.4385	-1.4385	-1.4385	-1.4385	-1.4385	-1.4385	-1.4385	-1.4385	-1.4385	-1.4385	-1.4385	-1.4385
1957	-0.9883	-0.9883	-0.9883	-0.9883	-0.9883	-0.9883	-0.9883	-0.9883	-0.9883	-0.9883	-0.9883	-0.9883
1958	-0.93159	-0.93159	-0.93159	-0.93159	-0.93159	-0.93159	-0.93159	-0.93159	-0.93159	-0.93159	-0.93159	-0.93159
1959	-1.53066	-1.53066	-1.53066	-1.53066	-1.53066	-1.53066	-1.53066	-1.53066	-1.53066	-1.53066	-1.53066	-1.53066
1960	-1.56256	-1.56256	-1.56256	-1.56256	-1.56256	-1.56256	-1.56256	-1.56256	-1.56256	-1.56256	-1.56256	-1.56256
1961	-2.07656	-2.07656	-2.07656	-2.07656	-2.07656	-2.07656	-2.07656	-2.07656	-2.07656	-2.07656	-2.07656	-2.07656
1962	-1.52712	-1.52712	-1.52712	-1.52712	-1.52712	-1.52712	-1.52712	-1.52712	-1.52712	-1.52712	-1.52712	-1.52712
1963	-1.34633	-1.34633	-1.34633	-1.34633	-1.34633	-1.34633	-1.34633	-1.34633	-1.34633	-1.34633	-1.34633	-1.34633
1964	-1.82134	-1.82134	-1.82134	-1.82134	-1.82134	-1.82134	-1.82134	-1.82134	-1.82134	-1.82134	-1.82134	-1.82134
1965	-1.66182	-1.66182	-1.66182	-1.66182	-1.66182	-1.66182	-1.66182	-1.66182	-1.66182	-1.66182	-1.66182	-1.66182
1966	-0.25453	-0.25453	-0.25453	-0.25453	-0.25453	-0.25453	-0.25453	-0.25453	-0.25453	-0.25453	-0.25453	-0.25453
1967	-0.82524	-0.82524	-0.82524	-0.82524	-0.82524	-0.82524	-0.82524	-0.82524	-0.82524	-0.82524	-0.82524	-0.82524
1968	0.39418	0.39418	0.39418	0.39418	0.39418	0.39418	0.39418	0.39418	0.39418	0.39418	0.39418	0.39418
1969	0.56433	0.56433	0.56433	0.56433	0.56433	0.56433	0.56433	0.56433	0.56433	0.56433	0.56433	0.56433
1970	-0.27225	-0.27225	-0.27225	-0.27225	-0.27225	-0.27225	-0.27225	-0.27225	-0.27225	-0.27225	-0.27225	-0.27225
1971	-0.59483	-0.59483	-0.59483	-0.59483	-0.59483	-0.59483	-0.59483	-0.59483	-0.59483	-0.59483	-0.59483	-0.59483
1972	-0.03475	-0.03475	-0.03475	-0.03475	-0.03475	-0.03475	-0.03475	-0.03475	-0.03475	-0.03475	-0.03475	-0.03475
1973	-1.58738	-1.58738	-1.58738	-1.58738	-1.58738	-1.58738	-1.58738	-1.58738	-1.58738	-1.58738	-1.58738	-1.58738
1974	-3.03366	-3.03366	-3.03366	-3.03366	-3.03366	-3.03366	-3.03366	-3.03366	-3.03366	-3.03366	-3.03366	-3.03366
1975	-3.24281	-3.24281	-3.24281	-3.24281	-3.24281	-3.24281	-3.24281	-3.24281	-3.24281	-3.24281	-3.24281	-3.24281
1976	-1.93831	-1.93831	-1.93831	-1.93831	-1.93831	-1.93831	-1.93831	-1.93831	-1.93831	-1.93831	-1.93831	-1.93831
1977	-2.00921	-2.00921	-2.00921	-2.00921	-2.00921	-2.00921	-2.00921	-2.00921	-2.00921	-2.00921	-2.00921	-2.00921
1978	-1.27898	-1.27898	-1.27898	-1.27898	-1.27898	-1.27898	-1.27898	-1.27898	-1.27898	-1.27898	-1.27898	-1.27898
1979	-0.63382	-0.63382	-0.63382	-0.63382	-0.63382	-0.63382	-0.63382	-0.63382	-0.63382	-0.63382	-0.63382	-0.63382
1980	-0.648	-0.648	-0.648	-0.648	-0.648	-0.648	-0.648	-0.648	-0.648	-0.648	-0.648	-0.648
1981	0.50761	0.50761	0.50761	0.50761	0.50761	0.50761	0.50761	0.50761	0.50761	0.50761	0.50761	0.50761
1982	-2.57284	-2.57284	-2.57284	-2.57284	-2.57284	-2.57284	-2.57284	-2.57284	-2.57284	-2.57284	-2.57284	-2.57284
1983	-0.86069	-0.86069	-0.86069	-0.86069	-0.86069	-0.86069	-0.86069	-0.86069	-0.86069	-0.86069	-0.86069	-0.86069
1984	-1.09819	-1.09819	-1.09819	-1.09819	-1.09819	-1.09819	-1.09819	-1.09819	-1.09819	-1.09819	-1.09819	-1.09819
1985	-1.07338	-1.07338	-1.07338	-1.07338	-1.07338	-1.07338	-1.07338	-1.07338	-1.07338	-1.07338	-1.07338	-1.07338
1986	-1.75044	-1.75044	-1.75044	-1.75044	-1.75044	-1.75044	-1.75044	-1.75044	-1.75044	-1.75044	-1.75044	-1.75044
1987	-0.65509	-0.65509	-0.65509	-0.65509	-0.65509	-0.65509	-0.65509	-0.65509	-0.65509	-0.65509	-0.65509	-0.65509
1988	-2.57993	-2.57993	-2.57993	-2.57993	-2.57993	-2.57993	-2.57993	-2.57993	-2.57993	-2.57993	-2.57993	-2.57993
1989	-2.42395	-2.42395	-2.42395	-2.42395	-2.42395	-2.42395	-2.42395	-2.42395	-2.42395	-2.42395	-2.42395	-2.42395
1990	-1.4704	-1.4704	-1.4704	-1.4704	-1.4704	-1.4704	-1.4704	-1.4704	-1.4704	-1.4704	-1.4704	-1.4704
1991	-0.25807	-0.25807	-0.25807	-0.25807	-0.25807	-0.25807	-0.25807	-0.25807	-0.25807	-0.25807	-0.25807	-0.25807
1992	0.66713	0.66713	0.66713	0.66713	0.66713	0.66713	0.66713	0.66713	0.66713	0.66713	0.66713	0.66713
1993	0.91526	0.91526	0.91526	0.91526	0.91526	0.91526	0.91526	0.91526	0.91526	0.91526	0.91526	0.91526
1994	1.39381	1.39381	1.39381	1.39381	1.39381	1.39381	1.39381	1.39381	1.39381	1.39381	1.39381	1.39381
1995	1.5037	1.5037	1.5037	1.5037	1.5037	1.5037	1.5037	1.5037	1.5037	1.5037	1.5037	1.5037
1996	-0.52748	-0.52748	-0.52748	-0.52748	-0.52748	-0.52748	-0.52748	-0.52748	-0.52748	-0.52748	-0.52748	-0.52748
1997	-0.45304	-0.45304	-0.45304	-0.45304	-0.45304	-0.45304	-0.45304	-0.45304	-0.45304	-0.45304	-0.45304	-0.45304
1998	0.81601	0.81601	0.81601	0.81601	0.81601	0.81601	0.81601	0.81601	0.81601	0.81601	0.81601	0.81601
1999	0.85855	0.85855	0.85855	0.85855	0.85855	0.85855	0.85855	0.85855	0.85855	0.85855	0.85855	0.85855
2000	-2.40269	-2.40269	-2.40269	-2.40269	-2.40269	-2.40269	-2.40269	-2.40269	-2.40269	-2.40269	-2.40269	-2.40269
2001	-0.91741	-0.91741	-0.91741	-0.91741	-0.91741	-0.91741	-0.91741	-0.91741	-0.91741	-0.91741	-0.91741	-0.91741
2002	0.36582	0.36582	0.36582	0.36582	0.36582	0.36582	0.36582	0.36582	0.36582	0.36582	0.36582	0.36582
2003	-0.02766	-0.02766	-0.02766	-0.02766	-0.02766	-0.02766	-0.02766	-0.02766	-0.02766	-0.02766	-0.02766	-0.02766
2004	-0.25807	-0.25807	-0.25807	-0.25807	-0.25807	-0.25807	-0.25807	-0.25807	-0.25807	-0.25807	-0.25807	-0.25807
2005	0.75929	0.75929	0.75929	0.75929	0.75929	0.75929	0.75929	0.75929	0.75929	0.75929	0.75929	0.75929
2006	-0.09501	-0.09501	-0.09501	-0.09501	-0.09501	-0.09501	-0.09501	-0.09501	-0.09501	-0.09501	-0.09501	-0.09501
2007	0.60686	0.60686	0.60686	0.60686	0.60686	0.60686	0.60686	0.60686	0.60686	0.60686	0.60686	0.60686
2008	-1.80361	-1.80361	-1.80361	-1.80361	-1.80361	-1.80361	-1.80361	-1.80361	-1.80361	-1.80361	-1.80361	-1.80361
2009	1.07478	1.07478	1.07478	1.07478	1.07478	1.07478	1.07478	1.07478	1.07478	1.07478	1.07478	1.07478
2010	0.84082	0.84082	0.84082	0.84082	0.84082	0.84082	0.84082	0.84082	0.84082	0.84082	0.84082	0.84082
2011	-2.2928	-2.2928	-2.2928	-2.2928	-2.2928	-2.2928	-2.2928	-2.2928	-2.2928	-2.2928	-2.2928	-2.2928
2012	-0.37859	-0.37859	-0.37859	-0.37859	-0.37859	-0.37859	-0.37859	-0.37859	-0.37859	-0.37859	-0.37859	-0.37859
2013	-0.86778	-0.86778	-0.86778	-0.86778	-0.86778	-0.86778	-0.86778	-0.86778	-0.86778	-0.86778	-0.86778	-0.86778
2014	-1.18681	-1.18681	-1.18681	-1.18681	-1.18681	-1.18681	-1.18681	-1.18681	-1.18681	-1.18681	-1.18681	-1.18681
2015	-1.03439	-1.03439	-1.03439	-1.03439	-1.03439	-1.03439	-1.03439	-1.03439	-1.03439	-1.03439	-1.03439	-1.03439
